# Supplementary material for: Net Clinical Benefit of Left Atrial Appendage Closure Versus Warfarin in Patients With Atrial Fibrillation: A Pooled Analysis of the Randomized PROTECT‐AF and PREVAIL Studies
Source: PubMed Central journal article supplement — J Am Heart Assoc. 2019 Nov 22;8(23):e013525. doi: 10.1161/JAHA.119.013525 (PMC6912972; doi:10.1161/jaha.119.013525), 2019-11-22

## **Supplemental Material**

**Table S1. List of participating hospitals in the Protect-AF and PREVAIL studies.**

|                                     |                                        | Protect-AF | PREVAIL |
|-------------------------------------|----------------------------------------|------------|---------|
| United States, Arizona              | Advanced Cardiac Specialists           | 1          |         |
|                                     | Arizona Arrhythmia                     | 1          | 1       |
|                                     | Mercy Gilbert Medical Center           |            | 1       |
|                                     |                                        |            |         |
| United States, California           | Foundation for Cardiovascular Medicine | 1          | 1       |
|                                     | Los Angeles Cardiology Associates      | 1          |         |
|                                     | Cedars-Sinai Medical Center            | 1          | 1       |
|                                     | El Camino Hospital                     | 1          |         |
|                                     | Orange County Heart                    | 1          | 1       |
|                                     | UC Davis Medical Center                | 1          |         |
|                                     | St. John's Hospital / Pacific Heart    | 1          | 1       |
|                                     | Scripps Green                          |            | 1       |
|                                     |                                        |            |         |
| United States, District of Columbia | Washington Hospital Center             | 1          |         |
|                                     |                                        |            |         |
| United States, Florida              | University of Miami                    | 1          |         |
|                                     | Baptist Cardiac and Vascular Institute | 1          | 1       |
|                                     | Bay Heart Group                        | 1          |         |
|                                     | Zasa Clinical Research                 |            | 1       |
|                                     | Florida Hospital                       |            | 1       |
|                                     |                                        |            |         |
| United States, Georgia              | Emory University Midtown Hospital      | 1          | 1       |
|                                     | Piedmont Hospital                      | 1          |         |
|                                     | Emory University Hospital              | 1          |         |
|                                     |                                        |            |         |
| United States, Illinois             | University of Chicago                  | 1          |         |
|                                     | North Shore University                 | 1          | 1       |
|                                     | Loyola University Medical Center       | 1          |         |
|                                     | Prairie Education Research Cooperative | 1          |         |
|                                     |                                        |            |         |
| United States, Iowa                 | Iowa Heart Center                      |            | 1       |
|                                     |                                        |            |         |
| United States, Kentucky             | Baptist Hospital West                  | 1          |         |
|                                     | University of Kentucky                 | 1          |         |
|                                     | Central Baptist Hospital               |            | 1       |
|                                     |                                        |            |         |
| United States, Louisiana            | Terrebonne General Medical Center      | 1          |         |
|                                     | Ochsner Clinic                         | 1          |         |
|                                     |                                        |            |         |

|                               |                                             |   |   |
|-------------------------------|---------------------------------------------|---|---|
| United States, Massachusetts  | Massachusetts General Hospital              | 1 | 1 |
|                               | Lahey Clinic                                |   | 1 |
|                               |                                             |   |   |
| United States, Michigan       | University of Michigan Medical Center       | 1 | 1 |
|                               | William Beaumont                            | 1 | 1 |
|                               |                                             |   |   |
| United States, Minnesota      | Abbott Northwestern Hospital                | 1 | 1 |
|                               | Mayo Clinic                                 | 1 | 1 |
|                               | St. Paul Heart Clinic                       | 1 |   |
|                               |                                             |   |   |
| United States, Mississippi    | University of Mississippi Healthcare Center | 1 |   |
|                               | Cardiology Associates of N. Mississippi     |   | 1 |
|                               |                                             |   |   |
| United States, Missouri       | St. Luke's Hospital                         | 1 | 1 |
|                               | St. John's Mercy                            |   | 1 |
|                               |                                             |   |   |
| United States, Nebraska       | Nebraska Heart Institute                    | 1 |   |
|                               | Bryan LGH                                   |   | 1 |
|                               |                                             |   |   |
| United States, New Jersey     | Cooper University Hospital                  | 1 |   |
|                               | Englewood Hospital and Medical Center       |   | 1 |
|                               |                                             |   |   |
| United States, New Mexico     | New Mexico Heart Institute                  | 1 |   |
|                               |                                             |   |   |
| United States, New York       | New York University Medical Center          | 1 | 1 |
|                               | Columbia University Medical Center          | 1 | 1 |
|                               | Mt. Sinai Medical Center                    | 1 | 1 |
|                               |                                             |   |   |
| United States, North Carolina | Carolinas Medical Center                    |   | 1 |
|                               |                                             |   |   |
| United States, Ohio           | Summa Health System                         | 1 |   |
|                               | Lindner Clinical Trial Center               | 1 | 1 |
|                               | Cleveland Clinic Foundation                 | 1 | 1 |
|                               | Ohio State University                       | 1 |   |
|                               | Riverside Methodist Hospital                | 1 |   |
|                               |                                             |   |   |
| United States, Pennsylvania   | Geisinger Medical Center                    | 1 |   |
|                               | Harrisburg Hospital / Associated            | 1 |   |

|                           |                                                       |   |   |
|---------------------------|-------------------------------------------------------|---|---|
|                           | Cardiology                                            |   |   |
|                           | Allegheny General Hospital                            | 1 |   |
|                           | Presbyterian University Hospital                      | 1 |   |
|                           | Moffitt Heart & Vascular                              | 1 | 1 |
|                           | Hospital of the University of Pennsylvania            |   | 1 |
|                           |                                                       |   |   |
| United States, Tennessee  | Mercy Medical Center West                             | 1 |   |
|                           | St. Thomas Research Institute                         | 1 | 1 |
|                           |                                                       |   |   |
| United States, Texas      | Texas Cardiac Arrhythmia                              | 1 | 1 |
|                           | St. Lukes Episcopal Hospital                          | 1 |   |
|                           | Baylor Research Institute                             |   | 1 |
|                           | Methodist Hospital                                    |   | 1 |
|                           |                                                       |   |   |
|                           |                                                       |   |   |
| United States, Utah       | Intermountain Medical Center                          | 1 | 1 |
|                           |                                                       |   |   |
| United States, Virginia   | University of Virginia                                | 1 |   |
|                           | Inova Fairfax Hospital                                | 1 |   |
|                           | Sentara Norfolk General Hospital                      | 1 |   |
|                           |                                                       |   |   |
| United States, Vermont    | Fletcher Allen                                        |   | 1 |
|                           |                                                       |   |   |
| United States, Washington | Swedish Medical Center                                | 1 | 1 |
|                           |                                                       |   |   |
| United States, Wisconsin  | Marshfield Clinic                                     | 1 |   |
|                           | St. Luke's Hospital                                   |   | 1 |
|                           |                                                       |   |   |
| Czech Republic            | Na Homolce                                            | 1 |   |
|                           |                                                       |   |   |
| Germany                   | Krankenhaus der Barmherzige Bruder                    | 1 |   |
|                           | Cardiovasculares Centrum Frankfurt - Sankt Katharinen | 1 |   |
|                           | Herzzentrum                                           | 1 |   |

**Figure S1. Net clinical benefit of LAAC compared with warfarin therapy over time in the artificially lower PE incidence scenario.**

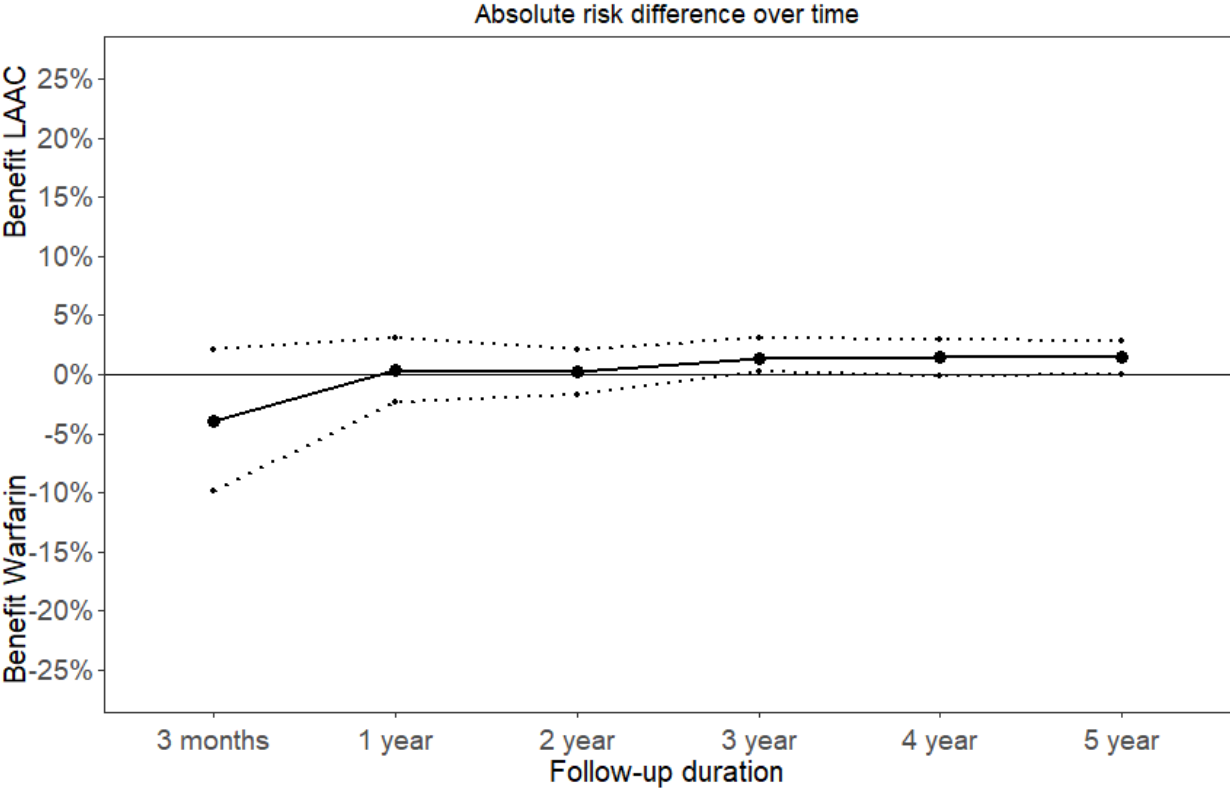

**Lowered PE incidence:** scenario where the PE incidence is artificially lower to 1% from 3%. mRS score for ischemic and hemorrhagic stroke are used and fixed weights for major bleed and pericardial effusion of 0.05.

Figure S2. Absolute risk difference using mRS weights for ischemic and hemorrhagic stroke and fix weights of 0.10 for major bleed and pericardial effusion events.

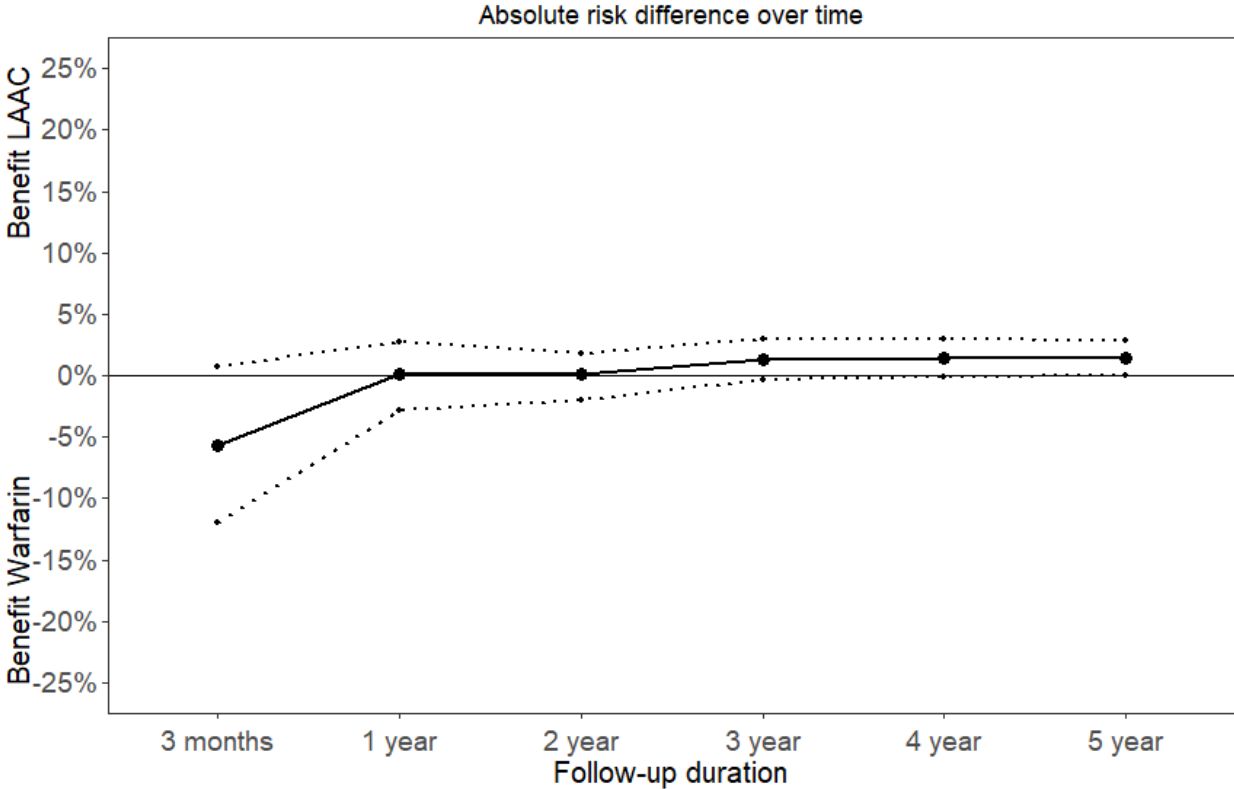

Figure S3. Absolute risk difference using mRS weights for ischemic and hemorrhagic stroke and fix weights of 0.15 for major bleed and pericardial effusion events.

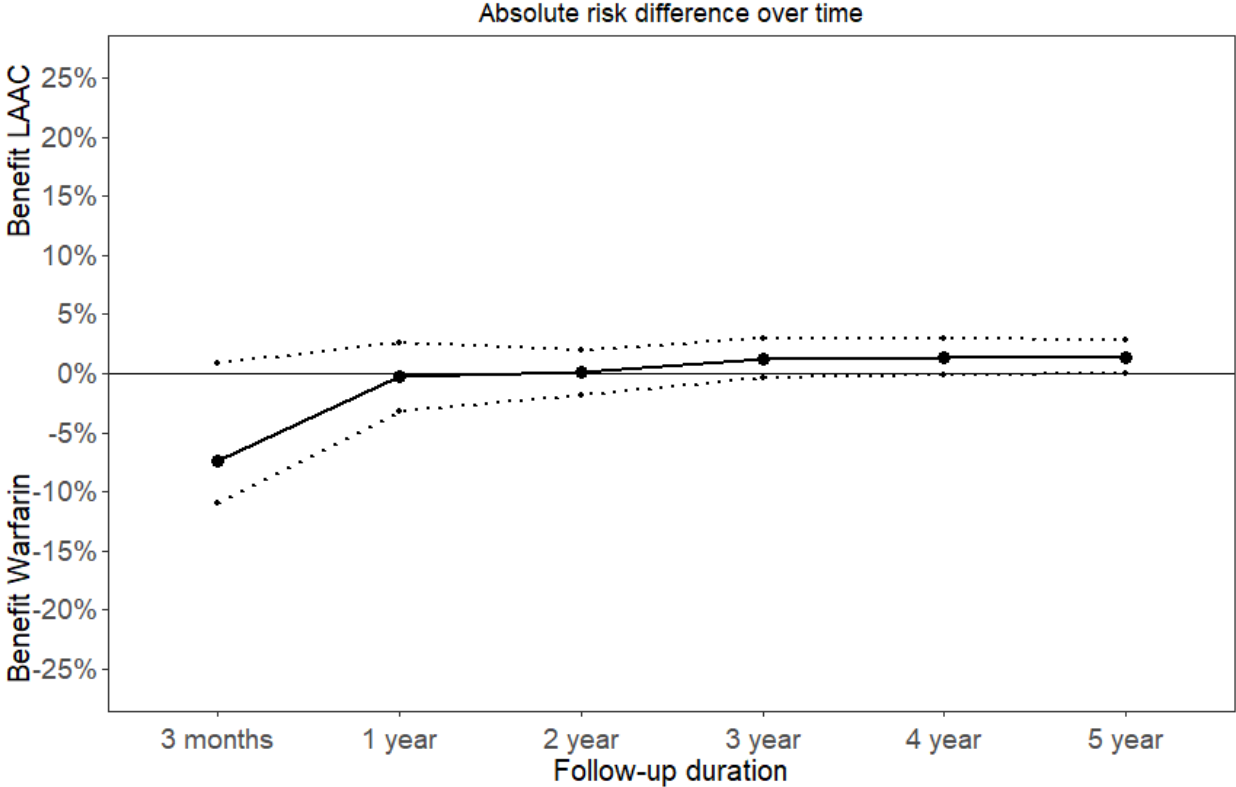

Supplement: JAH3-8-e013525-s001.pdf [file JAH3-8-e013525-s001.pdf]
